# Supplementary material for: Probing non-peptide agonists binding at the human nociceptin/orphanin FQ receptor: a molecular modelling study
Source: Royal Society of Chemistry journal article supplement (doi:10.1039/d4md00747f), 2024-12-10

## SUPPORTING INFORMATION

# Probing Non Peptide Agonists Binding at Human Nociceptin Receptor: A Molecular Modelling Study

*Matteo Gozzi,<sup>1</sup> Davide Malfacini,<sup>2</sup> Valentina Albanese,<sup>3</sup> Salvatore Pacifico,<sup>1</sup> Delia Preti,<sup>1</sup> Remo Guerrini,<sup>1</sup> Girolamo Calò,<sup>2</sup> and Antonella Ciancetta\*,<sup>1</sup>*

<sup>1</sup>Department of Chemical, Pharmaceutical and Agricultural Sciences, University of Ferrara,  
44121 Ferrara, Italy

<sup>2</sup>Department of Pharmaceutical and Pharmacological Sciences, University of Padova, Padova,  
35131, Italy

<sup>3</sup>Department of Environmental and Prevention Sciences, University of Ferrara, 44121 Ferrara,  
Italy

**KEYWORDS.** Molecular Docking; Molecular Dynamics; Peptide Docking; Structure-Based  
Drug Design, G Protein Coupled Receptors; NOP Receptor;

## Table of Contents

| <b>Molecular Modelling</b>                                     |                                                                                                  |     |
|----------------------------------------------------------------|--------------------------------------------------------------------------------------------------|-----|
| <b>Figure S1.</b>                                              | Per Residue N/OFQ(1-13)-NH <sub>2</sub> RMSF values                                              | S3  |
| <b>Table S1.</b>                                               | N/OFQ(1-13)-NH <sub>2</sub> median interaction scores                                            | S4  |
| <b>Table S2.</b>                                               | MM/PBSA trajectory Analysis for N/OFQ(1-13)-NH <sub>2</sub> , ( <i>R</i> )-Ro65-6570, and MCOPPB | S5  |
| <b>Figure S2.</b>                                              | Poses obtained by docking the ligands in the native 8F7X receptor structure                      | S6  |
| <b>Table S3.</b>                                               | Tanimoto similarity coefficients for ( <i>R</i> )-Ro65-6570 and MCOPPB                           | S7  |
| <b>Table S4.</b>                                               | Computed RBM01 and RBM03 median interaction scores                                               | S8  |
| <b>Figure S3.</b>                                              | Definitions of $\chi_1$ and $\chi_2$ W276 <sup>6,48</sup> values and conformations               | S9  |
| <b>Table S5.</b>                                               | Computed MBM04 and MBM05 median interaction scores                                               | S10 |
| <b>Figure S4.</b>                                              | Selected binding modes for ( <i>R</i> )-Ro65-6570 and MCOPPB                                     | S11 |
| <b>Table S6.</b>                                               | Details of Molecular Dynamics systems                                                            | S12 |
| <b>HPLC chromatograms of in house synthesized NOP agonists</b> |                                                                                                  |     |
|                                                                | HPLC chromatogram of N/OFQ                                                                       | S13 |
|                                                                | HPLC chromatogram of N/OFQ(1-13)-NH <sub>2</sub>                                                 | S13 |
|                                                                | HPLC chromatogram of Ro65-6570                                                                   | S13 |

**Figure S1.** Per residue N/OFQ(1-13)-NH<sub>2</sub> Ca atoms RMSF profile calculated for the three MD replicas (A) run1, blue box; B) run2, green box; C) run3, orange box). N/OFQ(1-13)-NH<sub>2</sub> functional division in different domains is highlighted in the graphs with different colours as follows: magenta, message; green, hinge; purple: address. domain).

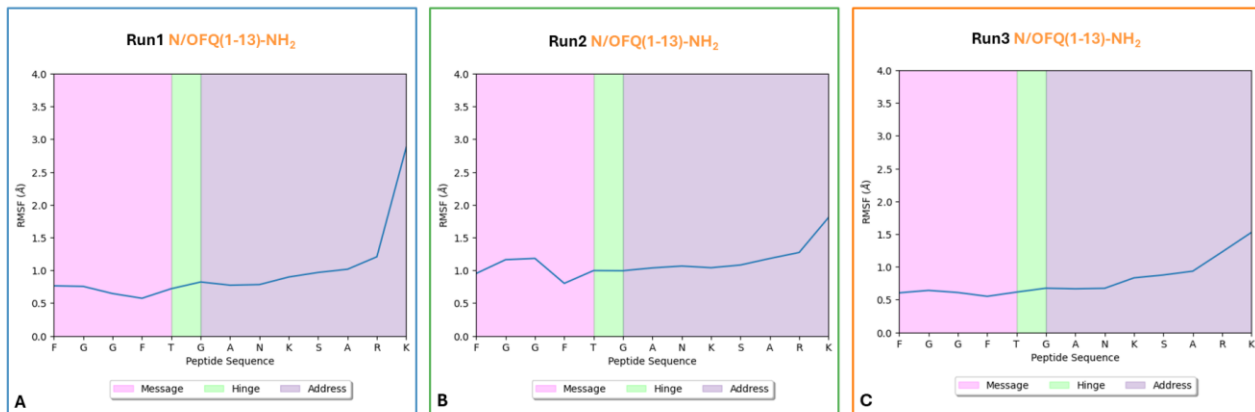

**Table S1.** Median hydrophobic contact (shades of red), hydrogen bond (shades of blue), and salt bridge (shades of green) scores computed for each N/OFQ(1-13)-NH<sub>2</sub> trajectory with PyContact. Only median scores exceeding 1 were reported, as they indicate a stable interaction over time. For the interaction between positively charge peptide N-terminus and D130 side chain (N-ter/D130) only the hydrogen bond contribution was considered, as PyContact is unable to detect salt-bridges involving groups other than standard protein charged side chains.

|        |       | N/OFQ(1-13)-NH <sub>2</sub> |      |      |      |      |      |      |      |      |      |      |      |      |      |      |      |      |      |      |      |      |      |      |      |      |      |      |      |      |      |
|--------|-------|-----------------------------|------|------|------|------|------|------|------|------|------|------|------|------|------|------|------|------|------|------|------|------|------|------|------|------|------|------|------|------|------|
|        |       | NOP residues                |      |      |      |      |      |      |      |      |      |      |      |      |      |      |      |      |      |      |      |      |      |      |      |      |      |      |      |      |      |
| Ligand |       | Q107                        | D110 | G114 | W116 | V126 | I127 | D130 | Y131 | M134 | Q192 | E194 | D195 | E196 | E197 | E199 | C200 | L201 | V202 | I219 | W276 | V279 | Q280 | V283 | Q286 | Q291 | P292 | T305 | Y309 |      |      |
| RUN1   | N-ter |                             |      |      |      |      |      | 7,49 |      |      |      |      |      |      |      |      |      |      |      |      |      |      |      |      |      |      |      |      | 1,19 | 2,33 |      |
|        | Phe1  |                             |      |      |      |      |      | 8,88 | 1,49 |      |      |      |      |      |      |      |      |      |      |      |      |      |      |      |      |      |      |      |      |      |      |
|        | Phe4  | 2,59                        |      |      | 1,19 | 1,65 | 3,49 |      |      |      |      |      |      |      |      |      |      | 4,39 | 3,71 | 4,00 |      |      | 1,45 | 3,11 | 1,65 |      |      |      |      |      |      |
|        | Thr5  |                             |      |      |      |      |      |      |      |      |      |      |      |      |      |      |      |      |      |      |      |      |      |      |      |      | 1,86 |      |      |      |      |
|        | Arg8  |                             | 8,32 |      |      |      |      |      |      |      |      |      |      |      |      |      |      |      |      |      |      |      |      |      |      |      |      |      |      |      |      |
|        | Lys9  |                             |      |      |      |      |      |      |      |      |      | 4,78 |      |      |      |      |      |      |      |      |      |      |      |      |      |      |      |      |      |      |      |
|        | Ser10 |                             |      |      |      |      |      |      |      |      |      |      |      |      |      |      |      |      |      |      |      |      |      |      |      |      |      |      | 2,70 | 2,86 |      |
|        | Arg12 |                             |      |      |      |      |      |      |      |      |      |      |      |      |      | 1,69 |      |      |      |      |      |      |      |      |      |      |      |      |      |      |      |
|        | Lys13 |                             |      |      |      |      |      |      |      |      |      |      |      |      |      |      |      |      |      |      |      |      |      |      |      |      |      |      |      |      |      |
|        | RUN2  | N-ter                       |      |      |      |      |      |      | 6,51 |      |      |      |      |      |      |      |      |      |      |      |      |      |      |      |      |      |      |      |      |      | 3,14 |
| Phe1   |       |                             |      |      |      |      |      | 2,17 | 2,55 |      |      |      |      |      |      |      |      |      |      |      |      |      |      |      |      |      |      |      |      |      |      |
| Phe4   |       | 3,72                        |      |      | 1,84 | 3,73 |      |      |      |      |      |      |      |      |      |      |      |      | 3,99 | 3,80 | 3,20 |      |      | 2,07 | 1,48 | 2,64 | 3,05 |      |      |      |      |
| Thr5   |       |                             |      |      |      |      |      |      |      |      |      |      |      |      |      |      |      |      |      |      |      |      |      |      |      |      | 3,95 |      |      |      |      |
| Arg8   |       |                             | 8,75 |      |      |      |      |      |      |      |      |      |      |      |      |      |      |      |      |      |      |      |      |      |      |      |      |      |      |      |      |
| Lys9   |       |                             |      |      |      |      |      |      |      |      |      | 3,75 | 1,59 | 2,26 | 4,12 |      |      |      |      |      |      |      |      |      |      |      |      |      |      |      |      |
| Ser10  |       |                             |      |      |      |      |      |      |      |      |      |      |      |      |      |      |      |      |      |      |      |      |      |      |      |      |      |      | 3,65 | 2,79 |      |
| Arg12  |       |                             |      |      |      |      |      |      |      |      |      |      |      |      | 4,29 |      |      |      |      |      |      |      |      |      |      |      |      |      |      |      |      |
| Lys13  |       |                             |      |      |      |      |      |      |      |      |      |      |      |      |      |      |      |      |      |      |      |      |      |      |      |      |      |      |      |      |      |
| RUN3   |       | N-ter                       |      |      |      |      |      |      | 5,37 |      |      |      |      |      |      |      |      |      |      |      |      |      |      |      |      |      |      |      |      |      | 3,49 |
|        | Phe1  |                             |      |      |      |      |      | 2,69 | 2,01 |      |      |      |      |      |      |      |      |      |      |      |      |      |      |      |      |      |      |      |      |      |      |
|        | Phe4  | 3,08                        |      |      | 1,53 | 4,49 |      |      |      |      |      |      |      |      |      |      |      |      | 3,57 | 4,14 | 3,81 |      |      | 2,79 | 4,76 | 2,78 |      |      |      |      |      |
|        | Thr5  |                             |      |      |      |      |      |      |      |      |      |      |      |      |      |      |      |      |      |      |      |      |      |      |      |      |      | 6,17 |      |      |      |
|        | Arg8  |                             | 8,42 |      |      |      |      |      |      |      |      |      |      |      |      |      |      |      |      |      |      |      |      |      |      |      |      |      |      |      |      |
|        | Lys9  |                             |      |      |      |      |      |      |      |      | 1,45 | 5,23 |      |      |      |      |      |      |      |      |      |      |      |      |      |      |      |      |      |      |      |
|        | Ser10 |                             |      |      |      |      |      |      |      |      |      |      |      |      |      |      |      |      |      |      |      |      |      |      |      |      |      |      | 3,10 | 3,96 |      |
|        | Arg12 |                             |      |      |      |      |      |      |      |      |      |      |      |      | 3,69 |      |      |      |      |      |      |      |      |      |      |      |      |      |      |      |      |
|        | Lys13 |                             |      |      |      |      |      |      |      |      |      | 5,12 |      |      |      |      |      |      |      |      |      |      |      |      |      |      |      |      |      |      |      |

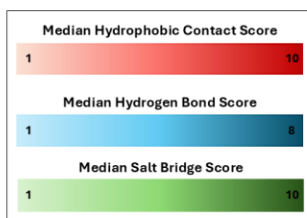

**Table S2.** MM/PBSA values and standard deviations of each run of the N/OFQ(1-13)-NH<sub>2</sub>, RBM01, RBM03, MBM04, MBM05 systems, calculated using the MMPBSA.py script implemented in the AmberTools24 package. Lowest MM/PBSA values detected among the three runs of each system are in bold.

| MM/PBSA ± σ [kcal/mol] |                             |                      |                      |                       |                       |
|------------------------|-----------------------------|----------------------|----------------------|-----------------------|-----------------------|
|                        | N/OFQ(1-13)-NH <sub>2</sub> | RBM01                | RBM03                | MBM04                 | MBM05                 |
| RUN1                   | -63.09 ± 20.51              | -26.85 ± 8.59        | -27.21 ± 5.76        | -18.46 ± 12.79        | -43.55 ± 15.62        |
| RUN2                   | -75.67 ± 18.08              | <b>-33.95 ± 4.72</b> | -31.92 ± 5.56        | <b>-41.68 ± 17.83</b> | <b>-57.72 ± 15.24</b> |
| RUN3                   | <b>-78.65 ± 18.86</b>       | -27.88 ± 7.14        | <b>-34.20 ± 7.63</b> | -18.05 ± 16.13        | -36.04 ± 12.04        |

**Figure S2.** Binding modes obtained by docking the ligands (*R*)-Ro65-6570 (A: RBM01, cyan sticks; and B: RBM02, tan sticks) and MCOPPB (C: MBM01, yellow sticks; and D: MBM02, red sticks) in the “8F7X\_mod” structure (green ribbons). The residues surrounding the ligands are depicted with green sticks.

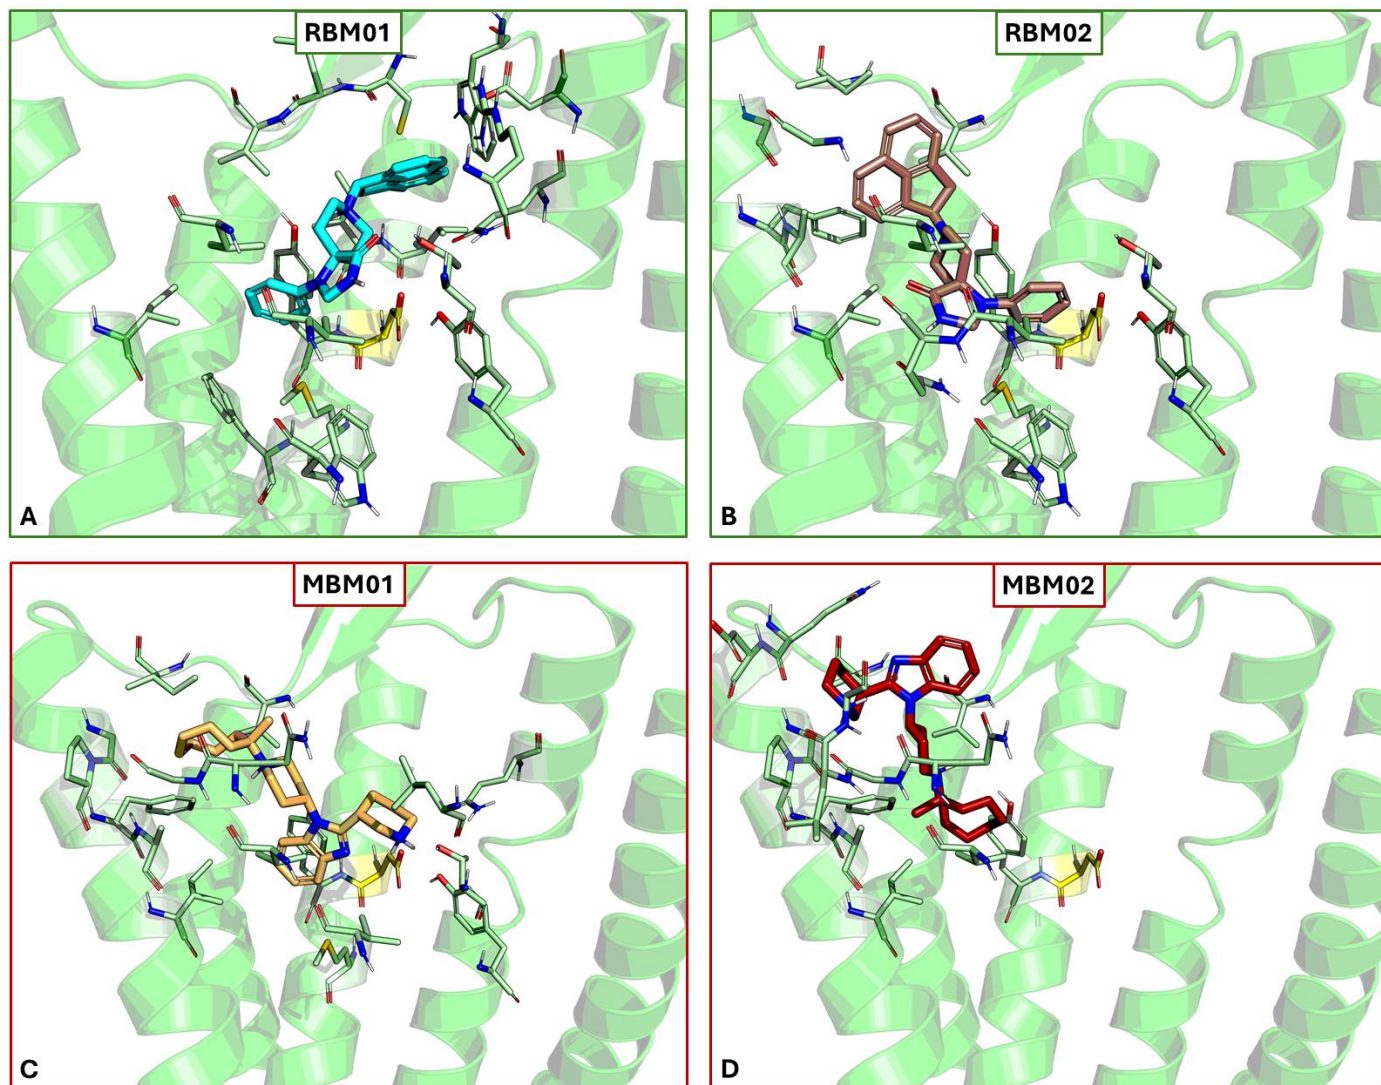

**Table S3.** Tanimoto similarity coefficients calculated between the reference ligands ((*R*)-Ro65-6570 and MCOPPB) and the three small molecule NOP antagonists C-24, C-35 and SB-612111 (PDB IDs of the antagonist-NOP complex: 4EA3, 5DHG and 5DHH, respectively). The Tanimoto coefficients were computed using the similarity search Node available in Knime and are based on MACCS Fingerprint. The highest value for each ligand, corresponding to the closest chemical similarity, is highlighted in green.

|                             | <b>C-24</b> | <b>C-35</b> | <b>SB-612111</b> |
|-----------------------------|-------------|-------------|------------------|
| <b>MCOPPB</b>               | 0.63        | 0.59        | 0.50             |
| <b>(<i>R</i>)-Ro65-6570</b> | 0.74        | 0.68        | 0.44             |

**Table S4.** Median hydrophobic contact (shades of red) and hydrogen bond (shades of blue) scores computed for each RBM01 and RBM03 trajectory with PyContact. Only median scores exceeding 1 were reported, as they indicate a stable interaction over time. For each run, the corresponding scores were calculated separately for the ligand functional groups, namely: the acenaphthanyl group, the phenyl ring, and the positively charged nitrogen of the 1,4-disubstituted piperidine (N+ moiety). For the interaction between the positively charged ligand nitrogen (N+) and the receptor D130 side-chain, only the hydrogen bond contribution is considered, as PyContact is unable to detect salt-bridges involving groups other than standard protein charged side chains.

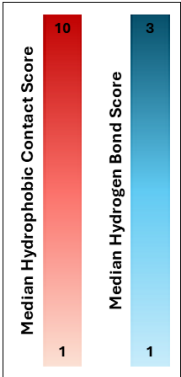

|               |                     | <b>RBM01</b>        |      |      |      |      |      |      |      |      |      |      |
|---------------|---------------------|---------------------|------|------|------|------|------|------|------|------|------|------|
|               |                     | <b>NOP residues</b> |      |      |      |      |      |      |      |      |      |      |
| <b>Ligand</b> |                     | T103                | Q107 | V126 | I127 | D130 | M134 | C200 | W276 | V279 | Q280 | Y309 |
| <b>RUN1</b>   | Acenaphthanyl Group |                     | 3.35 | 2.28 | 4.65 | 4.85 |      | 4.56 |      |      |      |      |
|               | Phenyl Ring         |                     |      |      |      |      |      |      | 2.04 | 1.72 | 1.66 |      |
|               | N+ Moiety           |                     |      |      |      | 1.99 |      |      |      |      |      |      |
| <b>RUN2</b>   | Acenaphthanyl Group | 1.32                | 3.53 | 2.48 | 8.42 | 5.54 |      | 2.56 |      |      |      |      |
|               | Phenyl Ring         |                     |      |      |      |      | 2.91 |      | 1.97 | 5.01 |      | 1.27 |
|               | N+ Moiety           |                     |      |      |      | 2.91 |      |      |      |      |      |      |
| <b>RUN3</b>   | Acenaphthanyl Group |                     | 9.56 |      | 1.53 | 3.20 |      | 3.34 |      |      |      |      |
|               | Phenyl Ring         |                     |      |      |      |      | 2.56 |      | 1.22 |      | 2.18 |      |
|               | N+ Moiety           |                     |      |      |      | 2.03 |      |      |      |      |      |      |

  

|               |                     | <b>RBM03</b>        |      |      |      |      |      |      |      |      |      |      |      |      |      |
|---------------|---------------------|---------------------|------|------|------|------|------|------|------|------|------|------|------|------|------|
|               |                     | <b>NOP residues</b> |      |      |      |      |      |      |      |      |      |      |      |      |      |
| <b>Ligand</b> |                     | Q107                | I127 | D130 | Y131 | M134 | F135 | C200 | I219 | S223 | W276 | V279 | Q280 | V283 | Y309 |
| <b>RUN1</b>   | Acenaphthanyl Group |                     |      | 5.39 | 7.97 | 4.61 |      |      | 1.55 | 2.31 | 1.43 | 2.71 | 6.13 | 2.50 |      |
|               | Phenyl Ring         | 2.03                | 1.90 |      |      |      |      | 1.88 |      |      |      |      |      |      |      |
|               | N+ Moiety           |                     |      | 2.82 |      |      |      |      |      |      |      |      |      |      |      |
| <b>RUN2</b>   | Acenaphthanyl Group |                     |      | 5.85 | 8.36 | 5.13 | 1.08 |      | 1.53 | 1.98 | 1.89 | 2.01 | 5.09 | 3.23 | 1.71 |
|               | Phenyl Ring         | 2.27                | 1.84 |      |      |      |      | 2.15 |      |      |      |      |      |      |      |
|               | N+ Moiety           |                     |      | 2.91 |      |      |      |      |      |      |      |      |      |      |      |
| <b>RUN3</b>   | Acenaphthanyl Group |                     |      | 5.41 | 7.94 | 6.69 | 1.52 |      | 1.36 | 1.39 | 1.62 | 2.00 | 4.71 | 2.85 |      |
|               | Phenyl Ring         | 2.37                | 1.81 |      |      |      |      | 2.69 |      |      |      |      |      |      |      |
|               | N+ Moiety           |                     |      | 2.90 |      |      |      |      |      |      |      |      |      |      |      |



**Figure S3.**  $\chi_1$  and  $\chi_2$  dihedral angle definitions for the W276<sup>6x48</sup> residue with corresponding angle values and conformer definitions.

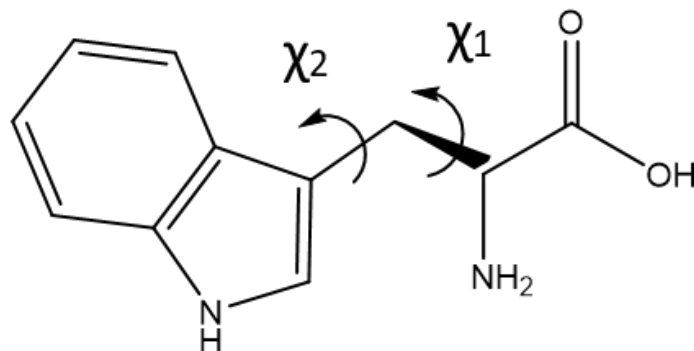

| $\chi_1$          |              |                   | $\chi_2$          |                   |              |
|-------------------|--------------|-------------------|-------------------|-------------------|--------------|
| 0 to 120          | 120 to -120  | -120 to 0         | 60 to 180         | 180 to -60        | -60 to 60    |
| <i>gauche (+)</i> | <i>trans</i> | <i>gauche (-)</i> | <i>gauche (-)</i> | <i>gauche (+)</i> | <i>trans</i> |

**Table S5.** Median hydrophobic contact (shades of red) and hydrogen bond (shades of blue) scores computed for each MBM04 and MBM05 trajectory with PyContact. Only median scores exceeding 1 were reported, as they indicate a stable interaction over time. For each run, the corresponding scores were calculated separately for the ligand functional groups, namely: the methyl-cyclo-octyl group, the phenyl ring, the positively charged nitrogen of the 3-monosubstituted piperidine (N+ Side Moiety), and the positively charged nitrogen of the 1,4-disubstituted piperidine (N+ Moiety). For the interactions between the positively charged ligand nitrogen atoms and the receptor D130 side-chain, indicated as N+/D130 and N+ Side/E199, respectively, only the hydrogen bond contribution is considered, as PyContact is unable to detect salt-bridges involving groups other than standard protein charged side chains.



|               |                          | <b>MBM04</b>        |      |      |      |      |      |      |      |      |      |      |      |      |      |      |
|---------------|--------------------------|---------------------|------|------|------|------|------|------|------|------|------|------|------|------|------|------|
|               |                          | <b>NOP residues</b> |      |      |      |      |      |      |      |      |      |      |      |      |      |      |
| <b>Ligand</b> |                          | V100                | Q107 | D110 | D130 | Y131 | M134 | E199 | C200 | W276 | V279 | V283 | L301 | R302 | T305 | Y309 |
| <b>RUN1</b>   | Methyl-cyclo-octyl Group | 1.50                |      |      | 3.54 |      | 1.54 |      |      | 1.31 | 1.11 |      |      |      |      | 1.84 |
|               | Phenyl Ring              |                     |      |      |      |      |      |      |      |      |      |      |      |      | 1.49 |      |
|               | N+ Side Moiety           |                     |      |      |      |      |      | 1.63 |      |      |      |      |      |      |      |      |
|               | N+ Moiety                |                     |      |      |      |      |      |      |      |      |      |      |      |      |      |      |
| <b>RUN2</b>   | Methyl-cyclo-octyl Group |                     |      |      | 3.15 | 4.96 | 1.79 |      |      |      |      |      |      |      |      |      |
|               | Phenyl Ring              | 3.78                | 1.47 |      |      |      |      |      |      |      |      |      | 2.07 | 7.50 | 2.34 |      |
|               | N+ Side Moiety           |                     |      | 2.25 |      |      |      | 2.94 |      |      |      |      |      |      |      |      |
|               | N+ Moiety                |                     |      |      |      |      |      |      |      |      |      |      |      |      |      |      |
| <b>RUN3</b>   | Methyl-cyclo-octyl Group |                     |      |      | 5.15 |      | 1.29 |      |      | 1.13 |      | 1.08 |      |      |      | 2.15 |
|               | Phenyl Ring              |                     |      |      |      |      |      |      |      |      |      |      |      | 1.39 |      |      |
|               | N+ Side Moiety           |                     |      |      |      |      |      | 1.69 |      |      |      |      |      |      |      |      |
|               | N+ Moiety                |                     |      |      |      |      |      |      |      |      |      |      |      |      |      |      |

  

|               |                          | <b>MBM05</b>        |      |      |      |      |      |      |      |      |      |      |      |      |
|---------------|--------------------------|---------------------|------|------|------|------|------|------|------|------|------|------|------|------|
|               |                          | <b>NOP residues</b> |      |      |      |      |      |      |      |      |      |      |      |      |
| <b>Ligand</b> |                          | Q107                | W116 | V126 | I127 | D130 | Y131 | M134 | E199 | C200 | I219 | Q280 | V283 | Y309 |
| <b>RUN1</b>   | Methyl-cyclo-octyl Group |                     |      |      |      | 5.52 | 4.28 | 1.71 |      |      |      |      |      | 1.20 |
|               | Phenyl Group             | 7.69                | 1.50 | 2.26 | 5.48 | 2.32 |      |      |      |      |      | 1.36 |      |      |
|               | N+ Side Moiety           |                     |      |      |      |      |      |      | 3.24 | 1.16 |      |      |      |      |
|               | N+ Moiety                |                     |      |      |      | 2.11 |      |      |      |      |      |      |      |      |
| <b>RUN2</b>   | Methyl-cyclo-octyl Group |                     |      |      |      | 4.76 | 4.39 | 1.94 |      |      |      | 1.85 | 1.01 | 1.28 |
|               | Phenyl Group             | 7.75                | 1.76 | 2.48 | 6.40 | 3.02 |      |      |      |      | 1.65 |      |      |      |
|               | N+ Side Moiety           |                     |      |      |      |      |      |      | 3.25 | 1.13 |      |      |      |      |
|               | N+ Moiety                |                     |      |      |      | 1.96 |      |      |      |      |      |      |      |      |
| <b>RUN3</b>   | Methyl-cyclo-octyl Group |                     |      |      |      | 5.11 | 5.29 | 1.91 |      |      | 1.12 |      |      | 1.70 |
|               | Phenyl Group             | 7.37                | 1.86 | 2.24 | 4.78 | 2.70 |      |      |      |      | 1.57 |      |      |      |
|               | N+ Side Moiety           |                     |      |      |      |      |      |      | 3.18 | 1.06 |      |      |      |      |
|               | N+ Moiety                |                     |      |      |      | 1.97 |      |      |      |      |      |      |      |      |

**Figure S4.** Final binding modes proposed for (*R*)-Ro65-6570 (RBM03; panels A and C, green sticks) and MCOPPB (MBM05; panels B and D; orange sticks). The receptor residues are coloured according to the type of interaction established with the ligand (yellow: salt bridges; blue: hydrogen bonds; salmon: hydrophobic interactions). Charged groups of both receptor and ligand are highlighted with a yellow sphere, salt-bridges and hydrogen bonds are represented with green and blue dashed lines, respectively. In panel C and D, TM7 was omitted for a better ligand visualization.

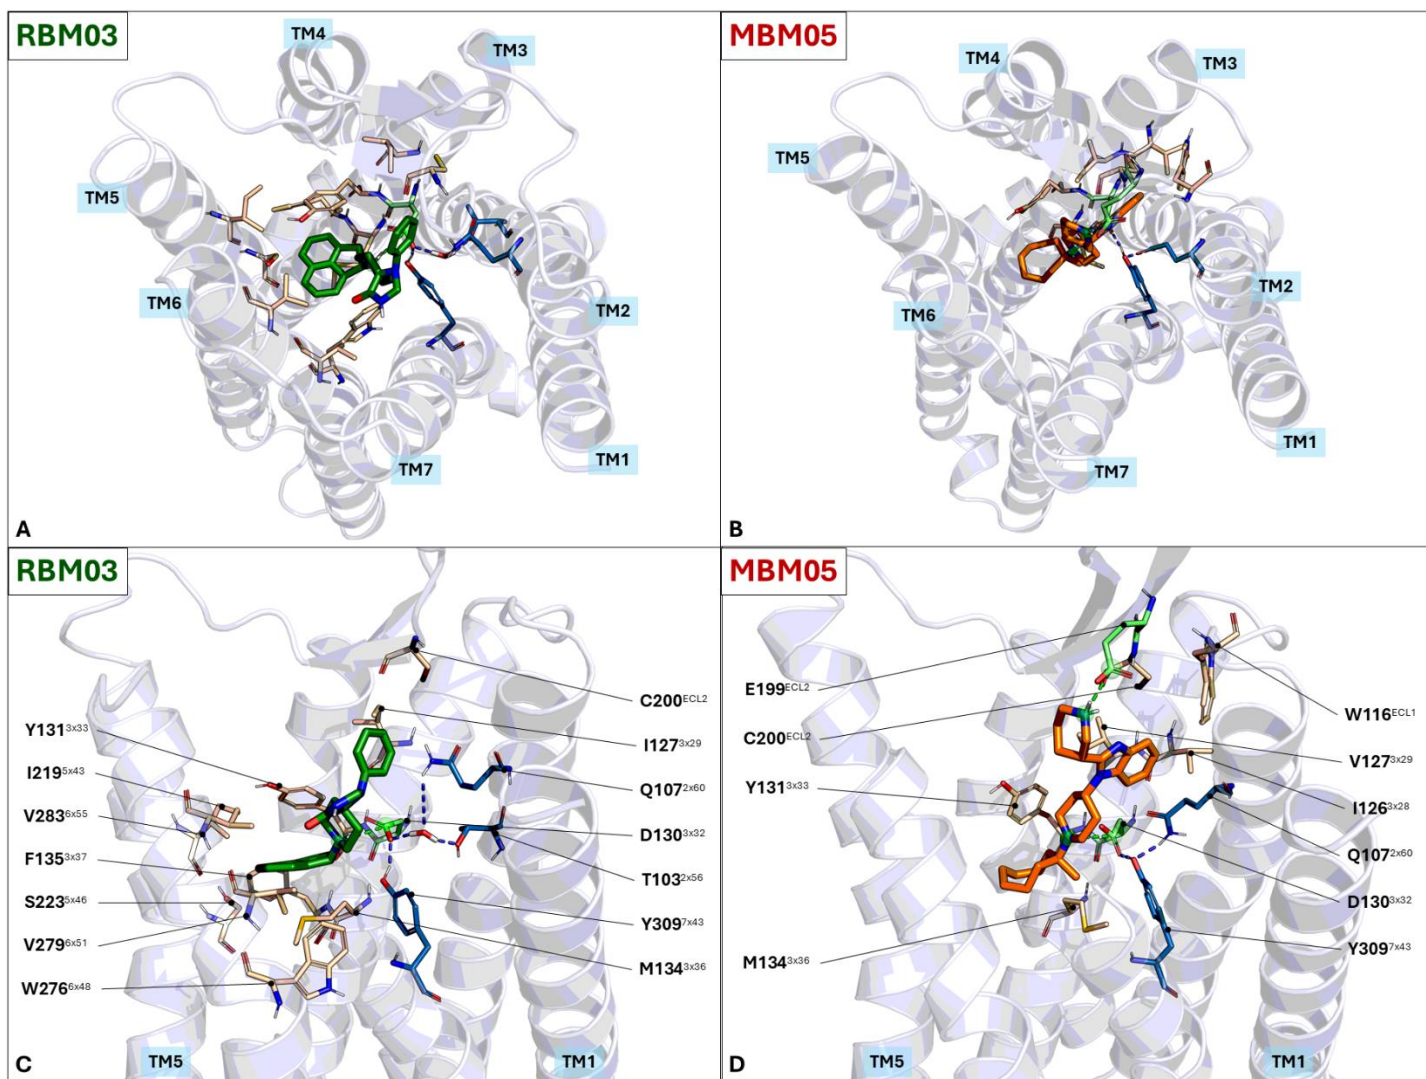

**Table S6.** Details of the N/OFQ(1-13)-NH<sub>2</sub>, MBM04, MBM05, RBM01, and RBM03 Molecular Dynamics systems. For each system, the following parameters are specified: termini capping (blue and red for the N- and C-terminus, respectively), residue number on which disulfide patches were applied (mustard), simulation cell dimensions (light-blue), number of lipids in the upper and lower leaflets (orange), ions (green), and water molecules and total atoms count (purple).

|                                   | Termini |        |         |         |        |        | Disulfide bonds |      | Size       |            |            | N° Lipids |        | N° Ions |     | N° atoms |       |
|-----------------------------------|---------|--------|---------|---------|--------|--------|-----------------|------|------------|------------|------------|-----------|--------|---------|-----|----------|-------|
|                                   | LIG(N)  | LIG(C) | PROT(N) | PROT(C) | Gai(N) | Gai(C) | PROT            | PROT | X          | Y          | Z          | Top       | Bottom | Na+     | Cl- | Water    | Total |
| <b>N/OFQ(1-13)-NH<sub>2</sub></b> | NTER    | CT2    | ACE     | CT3     | ACE    | CTER   | 123             | 200  | 80.2402373 | 80.2402373 | 131.626134 | 77        | 77     | 47      | 56  | 17574    | 78644 |
| <b>MBM04</b>                      |         |        | ACE     | CT3     |        |        | 123             | 200  | 80.2079707 | 80.2079707 | 119.629941 | 77        | 78     | 40      | 50  | 15257    | 71235 |
| <b>MBM05</b>                      |         |        | ACE     | CT3     |        |        | 123             | 200  | 80.0750704 | 80.0750704 | 119.611586 | 77        | 77     | 40      | 50  | 15271    | 71143 |
| <b>RBM01</b>                      |         |        | ACE     | CT3     |        |        | 123             | 200  | 80.3239657 | 80.3239657 | 118.753916 | 77        | 78     | 40      | 47  | 15257    | 71213 |
| <b>RBM03</b>                      |         |        | ACE     | CT3     |        |        | 123             | 200  | 80.3004745 | 80.3004745 | 118.753826 | 77        | 78     | 40      | 47  | 15260    | 71222 |

## HPLC chromatograms of in house synthesized NOP agonists

### N/OFQ

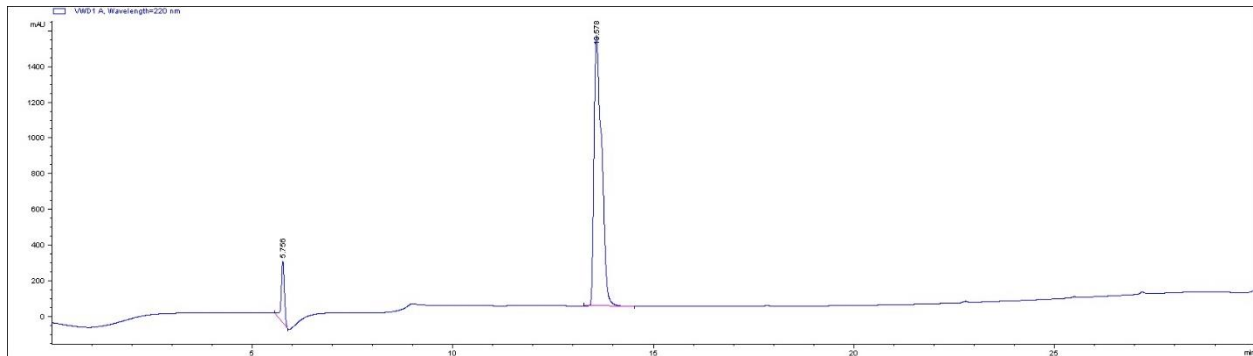

### N/OFQ(1-13)-NH<sub>2</sub>

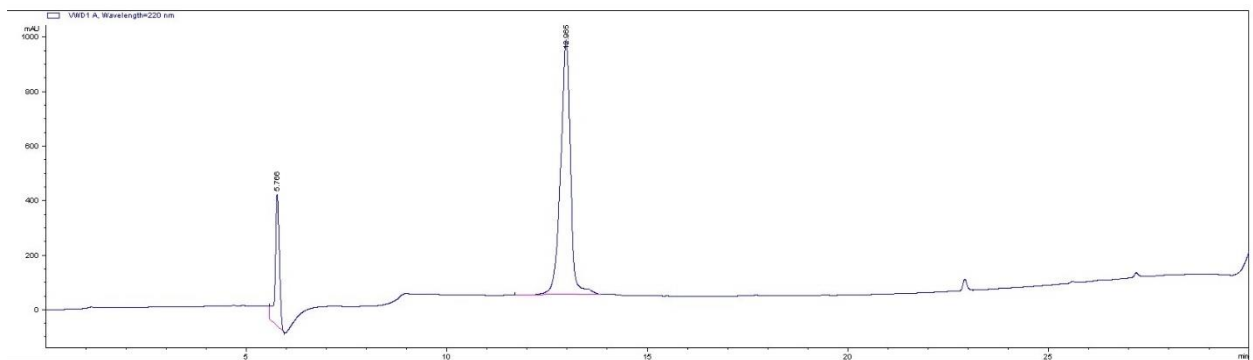

### Ro65-6570

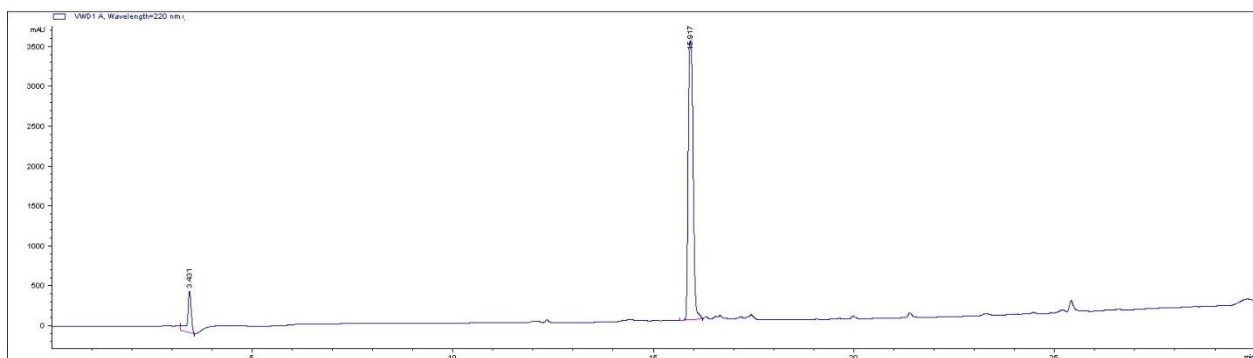

Supplement: d4md00747f1.pdf [file d4md00747f1.pdf]
